# Supplementary material for: Recommendations for effective documentation in regional anesthesia: an expert panel Delphi consensus project
Source: HighWire-hosted journal article supplement (doi:10.1136/rapm-2021-103136), 2022-02-22
Supplement: rapm-2021-103136supp003_data_supplement.pdf [file rapm-2021-103136supp003_data_supplement.pdf]

## APPENDIX 3.0 – SUMMARY OF US vs NON-US VOTING – ROUNDS 1, 2 AND 3

| Item                                                                                           | Round 1<br>(% agree) |        |       | Round 2<br>(% agree) |        |       | Round 3<br>(% agree) |        |       | Overall<br>Outcome              |
|------------------------------------------------------------------------------------------------|----------------------|--------|-------|----------------------|--------|-------|----------------------|--------|-------|---------------------------------|
|                                                                                                | US                   | Non-US | Total | US                   | Non-US | Total | US                   | Non-US | Total |                                 |
| Patient name                                                                                   | 100%                 | 100%   | 100%  | 100%                 | 95%    | 96%   |                      |        |       | Accepted                        |
| Patient age                                                                                    | 78%                  | 53%    | 60%   | 41%                  | 29%    | 32%   |                      |        |       | Rejected                        |
| Patient date of birth                                                                          | 87%                  | 78%    | 81%   | 91%                  | 93%    | 92%   |                      |        |       | Accepted                        |
| Patient gender                                                                                 | 78%                  | 73%    | 74%   | 77%                  | 69%    | 71%   | 84%                  | 74%    | 78%   | Accepted                        |
| Patient medical record /<br>hospital number                                                    | 100%                 | 93%    | 95%   | 95%                  | 95%    | 95%   |                      |        |       | Accepted                        |
| Patient weight                                                                                 | 87%                  | 78%    | 81%   | 95%                  | 89%    | 91%   |                      |        |       | Accepted                        |
| Patient height                                                                                 | 61%                  | 56%    | 58%   | 59%                  | 64%    | 62%   | 95%                  | 96%    | 96%   | Accepted                        |
| Patient BMI                                                                                    | 39%                  | 42%    | 41%   |                      |        |       |                      |        |       | Rejected                        |
| Patient ASA physical<br>status classification                                                  | 83%                  | 80%    | 82%   | 68%                  | 82%    | 78%   |                      |        |       | Accepted                        |
| Patient allergies                                                                              | 91%                  | 91%    | 91%   | 86%                  | 98%    | 95%   |                      |        |       | Accepted                        |
| Block performed by<br>_____ (name)                                                             | 100%                 | 96%    | 97%   | 100%                 | 100%   | 100%  |                      |        |       | Accepted                        |
| Grade of block<br>performer (e.g.<br>Consultant, Fellow,<br>Resident, Registrar etc.)          |                      |        |       | 59%                  | 69%    | 66%   | 68%                  | 68%    | 68%   | Accepted with<br>weak agreement |
| Name of supervisor (if<br>applicable)                                                          |                      |        |       | 100%                 | 84%    | 88%   |                      |        |       | Accepted                        |
| Name of assistant (if<br>applicable)                                                           |                      |        |       | 55%                  | 36%    | 42%   |                      |        |       | Rejected                        |
| Documentation of<br>patient consent gained<br>(as per local standards<br>e.g. written, verbal) | 91%                  | 91%    | 91%   | 95%                  | 95%    | 95%   |                      |        |       | Accepted                        |
| Documentation of<br>individual risks of<br>procedure discussed (as<br>per local standards)     | 87%                  | 85%    | 86%   | 77%                  | 80%    | 79%   |                      |        |       | Accepted                        |
| Pre-anesthetic / block<br>evaluation                                                           | 74%                  | 73%    | 73%   | 82%                  | 71%    | 74%   | 100%                 | 93%    | 96%   | Accepted                        |
| Pre-procedure diagnosis<br>(post-operative pain)                                               | 87%                  | 71%    | 76%   | 91%                  | 64%    | 71%   | 84%                  | 71%    | 77%   | Accepted                        |

|                                                                                       |      |      |      |      |      |      |     |     |     |                              |
|---------------------------------------------------------------------------------------|------|------|------|------|------|------|-----|-----|-----|------------------------------|
| management / surgical diagnosis)                                                      |      |      |      |      |      |      |     |     |     |                              |
| Timeout / WHO checklist                                                               | 96%  | 67%  | 76%  | 95%  | 65%  | 74%  | 90% | 35% | 57% | Accepted with weak agreement |
| Stop moment performed                                                                 | 39%  | 85%  | 72%  | 41%  | 84%  | 71%  | 60% | 93% | 80% | Accepted                     |
| Coagulation considered                                                                | 83%  | 75%  | 77%  | 73%  | 73%  | 73%  | 42% | 55% | 50% | Accepted with weak agreement |
| Intravenous access                                                                    | 70%  | 82%  | 78%  | 73%  | 84%  | 81%  |     |     |     | Accepted                     |
| Regional anesthesia procedure name                                                    | 100% | 100% | 100% | 100% | 100% | 100% |     |     |     | Accepted                     |
| Indication for regional anesthesia (surgical anesthesia or analgesia)                 | 91%  | 58%  | 68%  | 86%  | 55%  | 64%  | 74% | 31% | 48% | Rejected                     |
| Request by surgeon                                                                    | 78%  | 22%  | 38%  |      |      |      |     |     |     | Rejected                     |
| Patient position during regional anesthesia procedure                                 | 74%  | 69%  | 71%  | 91%  | 82%  | 84%  |     |     |     | Accepted                     |
| Monitors applied                                                                      | 91%  | 78%  | 82%  | 95%  | 75%  | 81%  |     |     |     | Accepted                     |
| Baseline vital signs                                                                  | 91%  | 69%  | 76%  | 100% | 71%  | 79%  |     |     |     | Accepted                     |
| Baseline visual analogue score                                                        | 35%  | 33%  | 33%  |      |      |      |     |     |     | Rejected                     |
| Pre-medication (type and quantity of sedation)                                        | 91%  | 89%  | 90%  | 95%  | 93%  | 94%  |     |     |     | Accepted                     |
| Level of sedation (no sedation / light sedation / deep sedation / general anesthesia) | 78%  | 80%  | 79%  | 73%  | 80%  | 78%  |     |     |     | Accepted                     |
| Rationale for block performance under spinal, epidural or general anesthesia          | 48%  | 35%  | 38%  |      |      |      |     |     |     | Rejected                     |
| Time and date of regional anesthesia procedure                                        | 100% | 96%  | 97%  | 100% | 100% | 100% |     |     |     | Accepted                     |
| Aseptic agent used                                                                    | 100% | 70%  | 79%  | 100% | 76%  | 83%  |     |     |     | Accepted                     |
| Sterile gloves used (if applicable)                                                   | 83%  | 59%  | 66%  | 95%  | 64%  | 73%  | 5%  | 7%  | 6%  | Rejected                     |
| Mask used (if applicable)                                                             | 83%  | 54%  | 62%  | 77%  | 60%  | 65%  | 5%  | 7%  | 6%  | Rejected                     |

|                                                                                     |      |      |      |      |      |      |     |     |     |          |
|-------------------------------------------------------------------------------------|------|------|------|------|------|------|-----|-----|-----|----------|
| Gown used (if applicable)                                                           | 35%  | 50%  | 45%  |      |      |      |     |     |     | Rejected |
| Ultrasound probe decontaminated according to local requirements                     | 39%  | 43%  | 42%  |      |      |      |     |     |     | Rejected |
| Sterile ultrasound transducer cover used (if applicable)                            | 74%  | 56%  | 61%  | 82%  | 65%  | 70%  | 5%  | 0%  | 2%  | Rejected |
| Sterile drape used (if applicable)                                                  | 70%  | 54%  | 58%  | 86%  | 53%  | 62%  | 0%  | 0%  | 0%  | Rejected |
| Aseptic technique used as per local policy                                          |      |      |      |      |      |      | 84% | 69% | 75% | Accepted |
| Skin infiltration with local anesthetic                                             | 96%  | 57%  | 69%  | 86%  | 80%  | 82%  |     |     |     | Accepted |
| Needle design: tip, manufacturer, length, gauge                                     | 100% | 87%  | 91%  | 95%  | 91%  | 92%  |     |     |     | Accepted |
| Local anesthetic used for regional anesthesia technique (concentration and volume)  | 100% | 100% | 100% | 100% | 100% | 100% |     |     |     | Accepted |
| Adrenaline dose if used (concentration)                                             | 100% | 94%  | 96%  | 100% | 98%  | 99%  |     |     |     | Accepted |
| Adjunct / additive used (bicarbonate, clonidine etc.)                               | 100% | 100% | 100% | 100% | 100% | 100% |     |     |     | Accepted |
| Side of block                                                                       | 100% | 100% | 100% | 100% | 100% | 100% |     |     |     | Accepted |
| Blocked side marked                                                                 | 91%  | 65%  | 73%  | 82%  | 62%  | 68%  | 32% | 25% | 28% | Rejected |
| Technique of needle localization (ultrasound / nerve stimulator / landmark)         | 100% | 100% | 100% | 100% | 100% | 100% |     |     |     | Accepted |
| Approach used (in plane / out of plane)                                             | 57%  | 80%  | 73%  | 64%  | 75%  | 71%  | 22% | 17% | 19% | Rejected |
| No Evoked Motor Response < ___mA (when applicable, e.g. when nerve stimulator used) | 74%  | 70%  | 71%  | 86%  | 80%  | 82%  |     |     |     | Accepted |

|                                                                         |      |     |     |      |     |     |     |     |     |          |
|-------------------------------------------------------------------------|------|-----|-----|------|-----|-----|-----|-----|-----|----------|
| Minimum current and current duration (if nerve stimulator used)         | 43%  | 67% | 60% | 82%  | 84% | 83% |     |     |     | Accepted |
| Description of motor response (if nerve stimulator used)                | 65%  | 48% | 53% | 91%  | 65% | 73% | 22% | 14% | 17% | Rejected |
| Description of quality of paresthesia (if using paresthesia technique)  | 70%  | 46% | 53% | 86%  | 55% | 64% | 11% | 3%  | 6%  | Rejected |
| Catheter tip location confirmed by ultrasound / nerve stimulator        | 57%  | 70% | 66% | 59%  | 62% | 61% | 0%  | 7%  | 4%  | Rejected |
| Technique of injection (via needle and/or catheter)                     | 52%  | 63% | 60% | 68%  | 60% | 62% | 16% | 17% | 17% | Rejected |
| Note on incremental injection                                           | 83%  | 48% | 58% | 91%  | 53% | 64% | 21% | 0%  | 8%  | Rejected |
| Extra-neural spread visualized                                          | 61%  | 65% | 64% | 82%  | 67% | 71% | 16% | 24% | 21% | Rejected |
| Presence / absence nerve swelling                                       |      |     |     |      |     |     | 11% | 24% | 19% | Rejected |
| Note on resistance during injection (pressure < 15psi)                  | 52%  | 57% | 56% | 59%  | 60% | 60% | 6%  | 10% | 8%  | Rejected |
| Absence of blood on aspiration                                          | 96%  | 81% | 86% | 95%  | 84% | 87% |     |     |     | Accepted |
| Needle depth before injection                                           | 57%  | 33% | 40% |      |     |     |     |     |     | Rejected |
| Catheter depth at the skin                                              | 83%  | 91% | 88% | 82%  | 95% | 91% |     |     |     | Accepted |
| Absence of pain / paresthesia during injection                          | 100% | 85% | 90% | 91%  | 85% | 87% |     |     |     | Accepted |
| Technique (approach used e.g. median / paramedian)                      | 96%  | 93% | 94% | 100% | 93% | 95% |     |     |     | Accepted |
| Vertebral level of needle insertion                                     | 100% | 98% | 99% | 100% | 98% | 99% |     |     |     | Accepted |
| Technique used: Loss of resistance to saline/air for epidural insertion | 91%  | 93% | 92% | 100% | 96% | 97% |     |     |     | Accepted |
| Number of attempts                                                      | 83%  | 93% | 90% | 95%  | 93% | 94% |     |     |     | Accepted |

|                                                                                          |      |     |     |      |      |      |     |     |     |          |
|------------------------------------------------------------------------------------------|------|-----|-----|------|------|------|-----|-----|-----|----------|
| Epidural needle depth at loss of resistance                                              | 96%  | 96% | 96% | 91%  | 96%  | 95%  |     |     |     | Accepted |
| Catheter depth at the skin                                                               | 96%  | 98% | 97% | 95%  | 96%  | 96%  |     |     |     | Accepted |
| Method used to secure catheter                                                           |      |     |     | 59%  | 40%  | 45%  |     |     |     | Rejected |
| Note on aspiration and action taken                                                      | 100% | 87% | 91% | 100% | 82%  | 87%  |     |     |     | Accepted |
| Epidural test dose (if applicable)                                                       | 100% | 93% | 95% | 100% | 96%  | 97%  |     |     |     | Accepted |
| Absence of pain / paresthesia during injection                                           | 96%  | 85% | 88% | 86%  | 84%  | 84%  |     |     |     | Accepted |
| Dermatomal level of spinal or epidural block achieved (if assessed)                      | 65%  | 80% | 75% | 100% | 87%  | 91%  |     |     |     | Accepted |
| Complications (neuraxial)                                                                | 100% | 98% | 99% | 100% | 100% | 100% |     |     |     | Accepted |
| Adequacy of regional anesthesia procedure                                                | 74%  | 69% | 70% | 59%  | 75%  | 70%  | 22% | 45% | 36% | Rejected |
| Complications (nerve block)                                                              | 100% | 96% | 97% | 100% | 98%  | 99%  |     |     |     | Accepted |
| Ultrasound image included in patient record (if US used)                                 |      |     |     | 82%  | 25%  | 42%  |     |     |     | Rejected |
| Patient vital signs after the procedure                                                  | 87%  | 65% | 71% | 95%  | 71%  | 78%  |     |     |     | Accepted |
| Post block monitoring completed by _____/ handed over/off to _____ (e.g. Recovery, PACU) |      |     |     | 73%  | 45%  | 53%  | 17% | 0%  | 6%  | Rejected |
| Patient visual analogue score after the procedure                                        | 39%  | 41% | 40% |      |      |      |     |     |     | Rejected |
| Post procedure instructions                                                              | 65%  | 91% | 83% | 73%  | 89%  | 84%  |     |     |     | Accepted |
